# Supplementary material for: Estrogen receptor β exerts tumor suppressive effects in prostate cancer through repression of androgen receptor activity
Source: PubMed Central journal article supplement (PMC7228066; doi:10.1371/journal.pone.0226057), 2020-05-15
Supplement: pone.0226057.s005.pdf [file pone.0226057.s005.pdf]

R1881  
 ERβ Control  
 Ly3201 DMSO Ly3201 DMSO

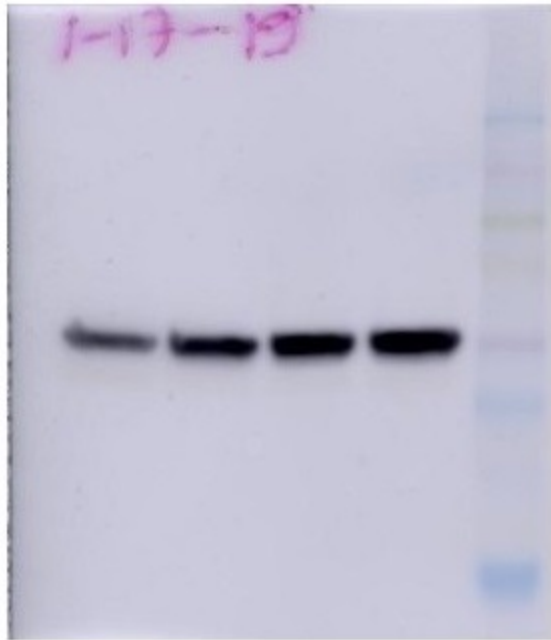

FKBP5

R1881  
 ERβ Control  
 Ly3201 DMSO Ly3201 DMSO

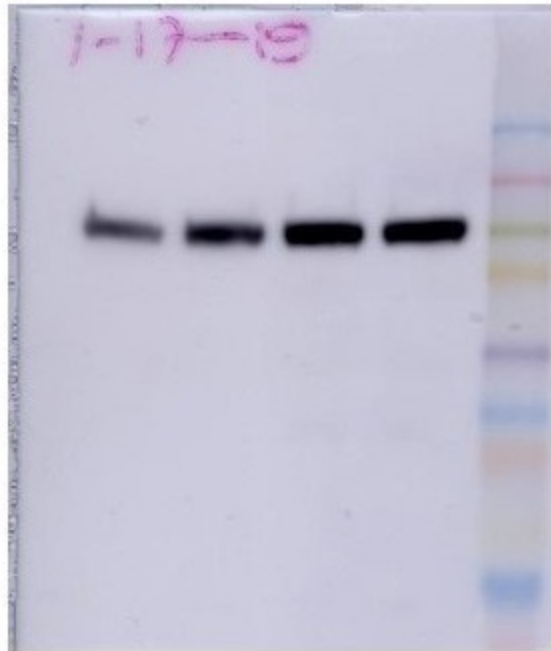

AR

R1881  
 ERβ Control  
 Ly3201 DMSO Ly3201 DMSO

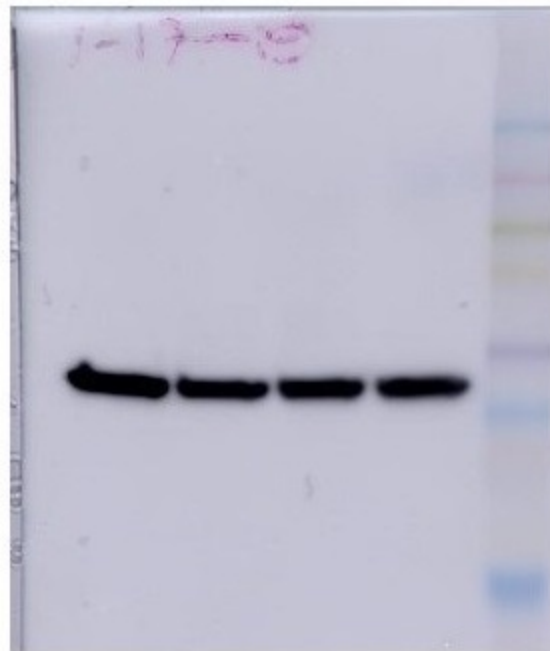

Actin

R1881  
 ERβ Control  
 Ly3201 DMSO Ly3201 DMSO

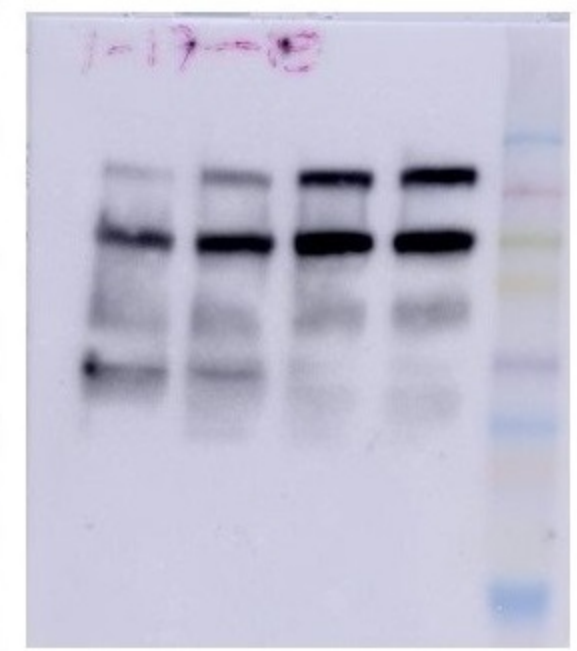

TBC1D4

R1881  
 Control ERβ  
 DMSO Ly3201 DMSO Ly3201

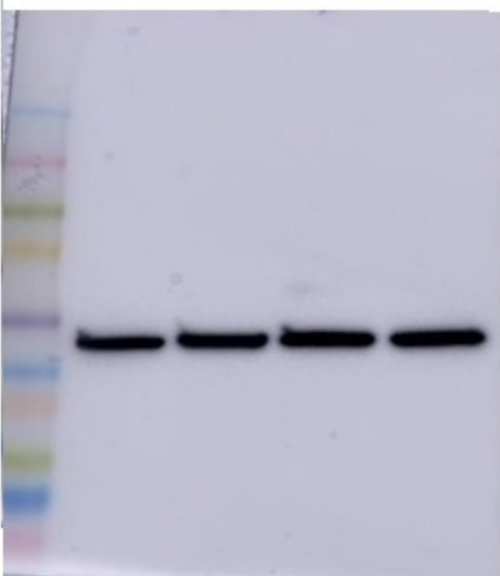

Actin

R1881  
 Control ERβ  
 DMSO Ly3201 DMSO Ly3201

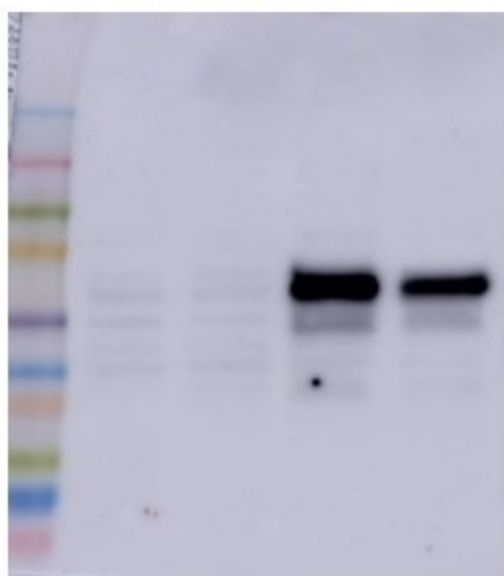

ERbeta

R1881

| R1881  |         |
|--------|---------|
| ERβ    | Control |
| Ly3201 | DMSO    |
| Ly3201 | DMSO    |

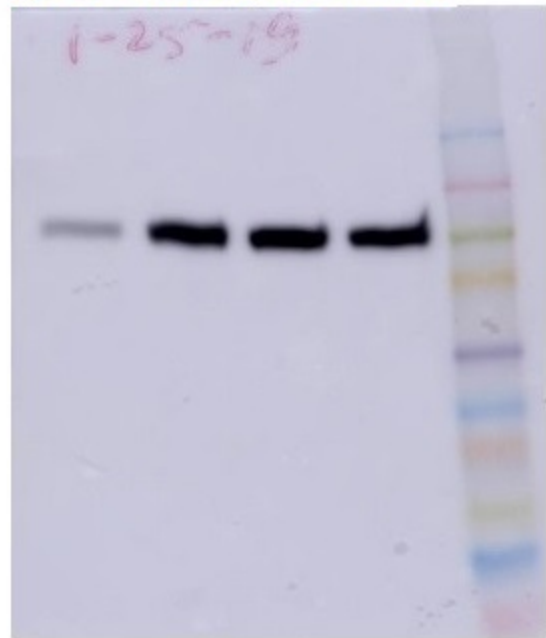

AR

R1881

| R1881  |         |
|--------|---------|
| ERβ    | Control |
| Ly3201 | DMSO    |
| Ly3201 | DMSO    |

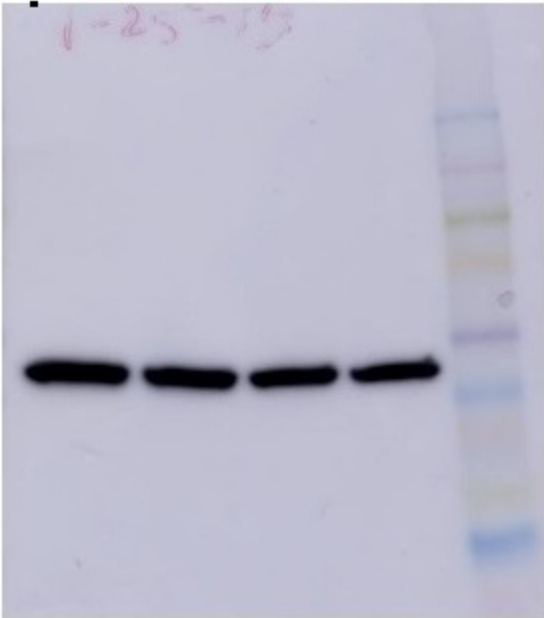

Actin

R1881

| R1881  |         |
|--------|---------|
| ERβ    | Control |
| Ly3201 | DMSO    |
| Ly3201 | DMSO    |

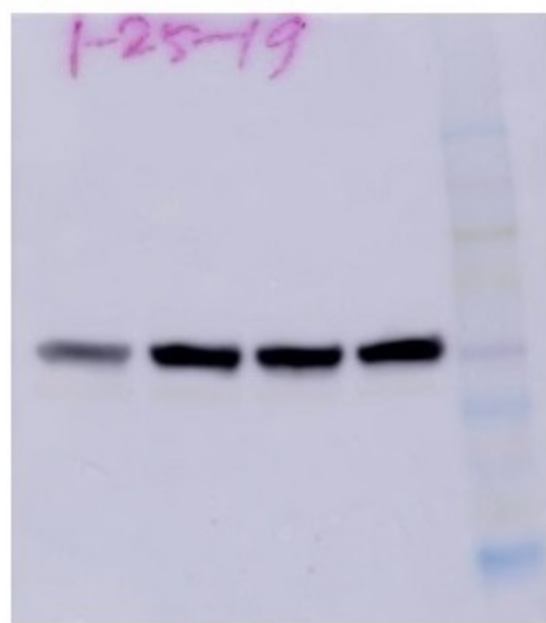

FKBP5

| Ly3201 | DMSO | Ly3201 | DMSO |
|--------|------|--------|------|
| Ly3201 | DMSO | Ly3201 | DMSO |

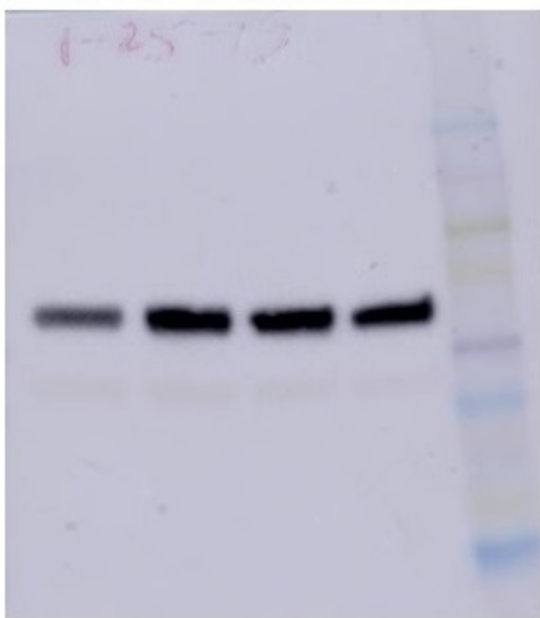

pAMPK

| Ly3201 | DMSO | Ly3201 | DMSO |
|--------|------|--------|------|
| Ly3201 | DMSO | Ly3201 | DMSO |

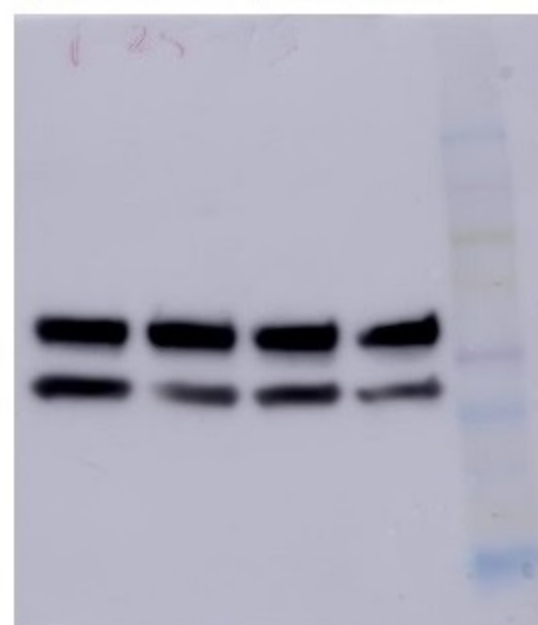

AMPK

| Ly3201 | DMSO | Ly3201 | DMSO |
|--------|------|--------|------|
| Ly3201 | DMSO | Ly3201 | DMSO |

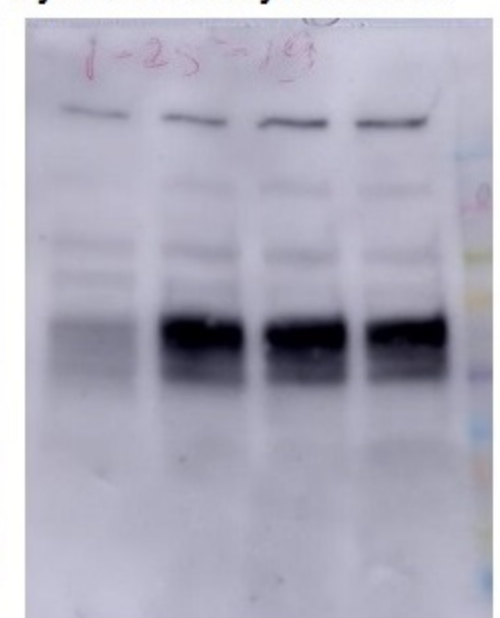

CAMKK2
